# Supplementary material for: HORMESIS RESULTS IN TRADE-OFFS WITH IMMUNITY
Source: PubMed Central journal article supplement (PMC4282086; doi:10.1111/evo.12453), 2014-06-20

**Supplementary Figure 1:** Cox hazard proportions of pathogen challenged flies in relation to their untreated counterparts (dashed line) for each genotype ( $\pm$  SE). Black circles indicate background genotypes and grey bars represent knockdown and knockout lines. \*\* -  $P < 0.01$ , \*\*\* -  $P < 0.001$

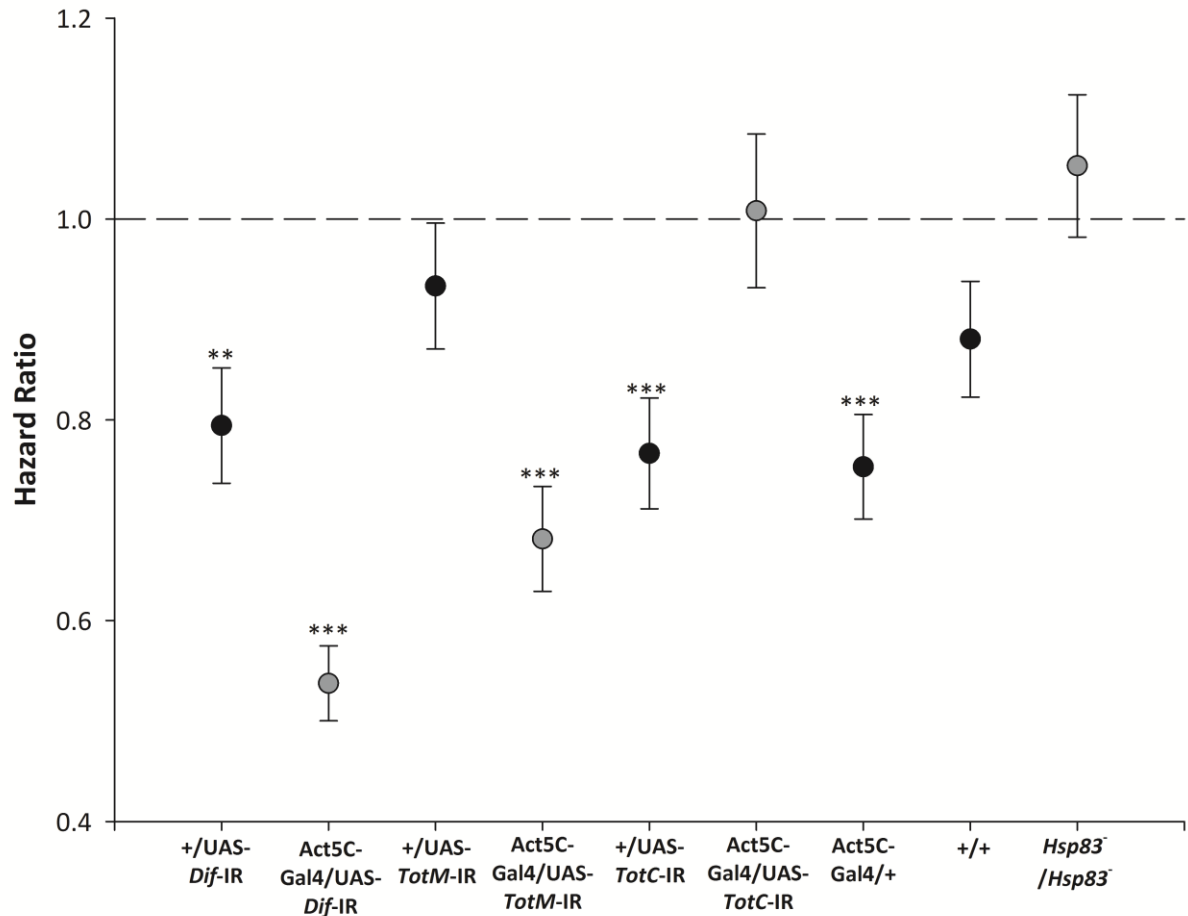

Supplement: evo0068-2225-SD1.pdf [file evo0068-2225-SD1.pdf]
