# Supplementary material for: HORMESIS RESULTS IN TRADE-OFFS WITH IMMUNITY
Source: PubMed Central journal article supplement (PMC4282086; doi:10.1111/evo.12453), 2014-06-20

**Supplementary Figure 2:** Survival curves for each of the 9 genotypes. Black lines are the survival curves for untreated cohorts while grey lines represent survival curves for pathogen challenged cohorts.

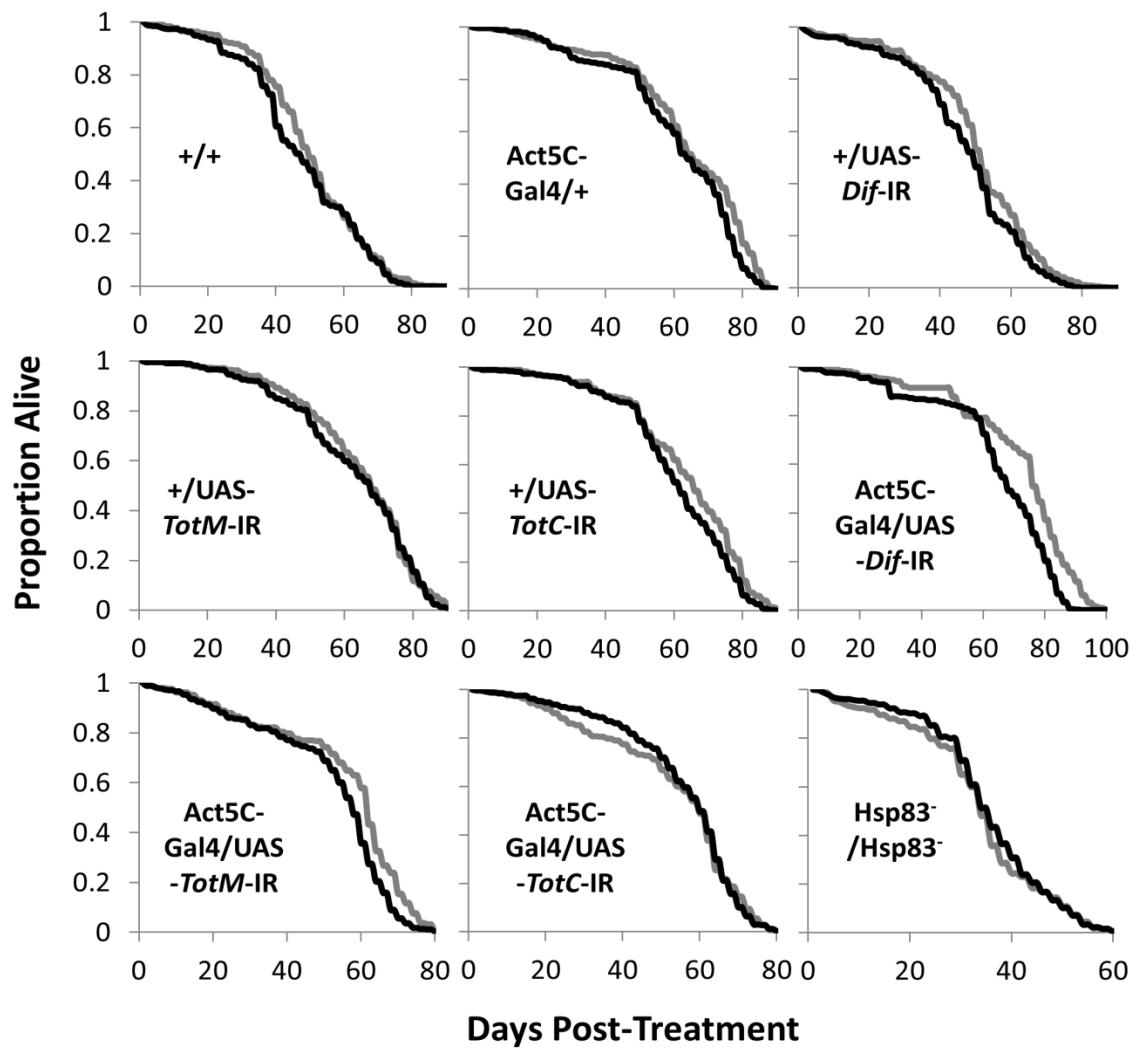

Supplement: evo0068-2225-SD2.pdf [file evo0068-2225-SD2.pdf]
