# Supplementary material for: HORMESIS RESULTS IN TRADE-OFFS WITH IMMUNITY
Source: PubMed Central journal article supplement (PMC4282086; doi:10.1111/evo.12453), 2014-06-20

**Supplementary Figure 3:** Mean fecundity of each genotype. Black indicates flies treated with a sham treatment (control) and grey indicates flies treated with heat-killed fungal spores ( $\pm$  SE). Average fecundity was taken from pupae counts over 10 day samples. \* -  $P < 0.05$ , \*\* -  $P < 0.01$

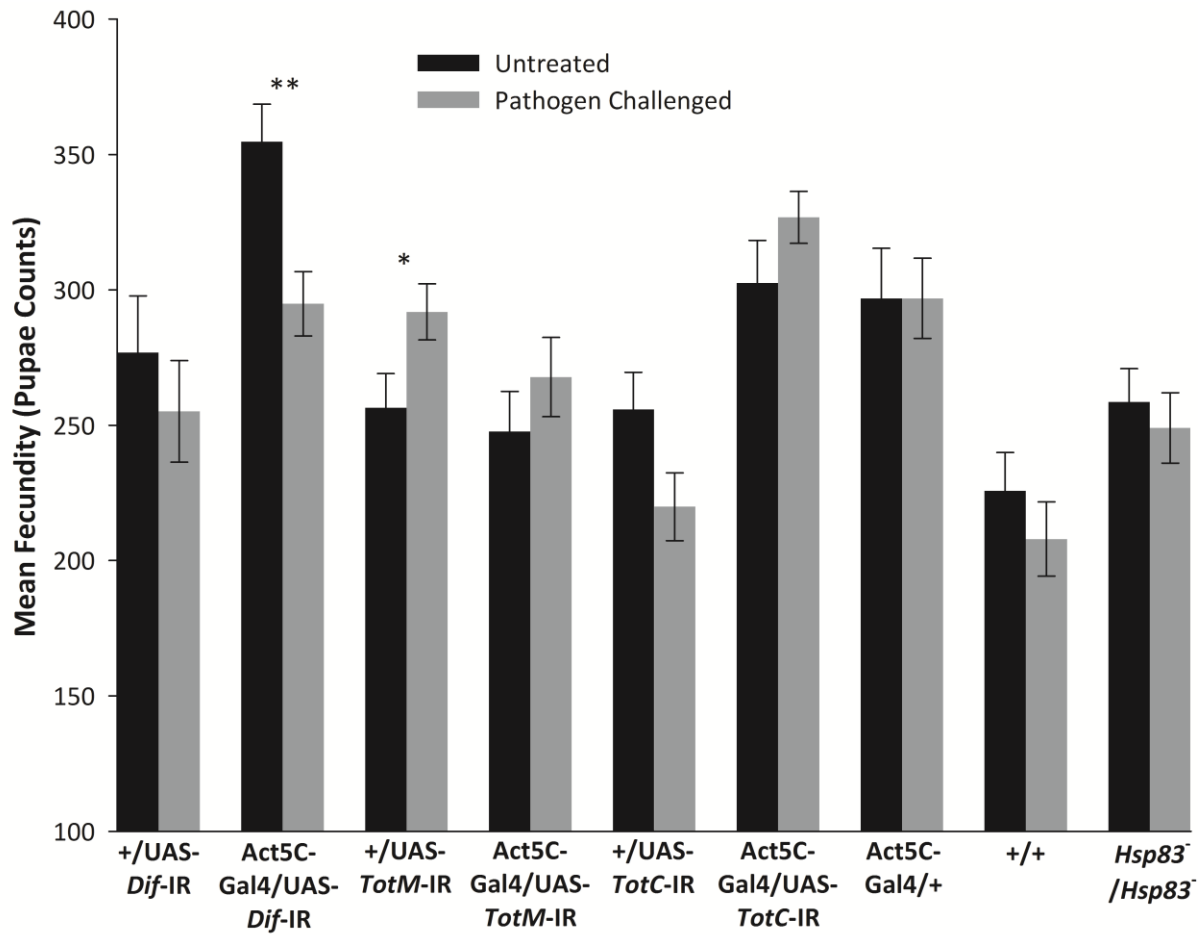

Supplement: evo0068-2225-SD3.pdf [file evo0068-2225-SD3.pdf]
